# Supplementary material
Source: PubMed Central journal article supplement (PMC4280613)
Supplement: pnas.201410443SI.pdf [file pnas.201410443SI.pdf]

# Supporting Information

Iglesias and Whitlock 10.1073/pnas.1410443111

**Table S1. Probability of positive deviations from the regional trend in biomass burning at each site**

| Site            | Before human occupation | After human occupation |
|-----------------|-------------------------|------------------------|
| L. El Trébol    | 0.11                    | 0.38                   |
| L. Padre Laguna | 0.06                    | 0.10                   |
| L. Huala Hué    | 0.01                    | 0.13                   |
| L. Cóndor       | 0.09                    | 0.00                   |
| L. Mosquito     | 0.09                    | 0.01                   |
| L. La Zeta      | 0.11                    | 0.02                   |
| L. Theobald     | 0.05                    | 0.15                   |

Probabilities are not significantly different at the 0.05 alpha level.

**Table S2. Model selection results**

| Model                                                                                                    | Family            | AIC     |
|----------------------------------------------------------------------------------------------------------|-------------------|---------|
| <b>Forest taxa data</b>                                                                                  |                   |         |
| $\alpha + f(\text{time}_i) + \text{site}_i + \log(\text{terrestrial pollen sum}^{-1})_i + \varepsilon_i$ | Poisson           | 20,134  |
| $\alpha + f(\text{time}_i) + \log(\text{terrestrial pollen sum}^{-1})_i + \varepsilon_i$                 | Poisson           | 29,960  |
| $\alpha + f(\text{time}_i) + \text{site}_i + \log(\text{terrestrial pollen sum}^{-1})_i + \varepsilon_i$ | Negative binomial | 7,056   |
| $\alpha + f(\text{time}_i) + \log(\text{terrestrial pollen sum}^{-1})_i + \varepsilon_i$                 | Negative binomial | 7,114   |
| $\alpha + \beta \times \text{time}_i + \text{site}_i + \log(\text{terrestrial pollen sum}^{-1})_i$       | Negative binomial | 7,078   |
| <b>Charcoal data</b>                                                                                     |                   |         |
| $\alpha + f(\text{time}_i) + \text{site}_i + \log(\text{accumulation rate})_i + \varepsilon_i$           | Poisson           | 438,797 |
| $\alpha + f(\text{time}_i) + \log(\text{accumulation rate})_i + \varepsilon_i$                           | Poisson           | 240,686 |
| $\alpha + f(\text{time}_i) + \text{site}_i + \log(\text{accumulation rate})_i + \varepsilon_i$           | Negative binomial | 54,665  |
| $\alpha + f(\text{time}_i) + \log(\text{accumulation rate})_i + \varepsilon_i$                           | Negative binomial | 58,960  |
| $\alpha + \beta \times \text{time}_i + \text{site}_i + \log(\text{accumulation rate})_i$                 | Negative binomial | 56,512  |

Forest taxa and charcoal have been modeled as smoothing functions of the concatenated time data of all sites [ $f(\text{time}_i)$ ] and the nominal variable  $\text{site}_i$ .  $\alpha$  is the intercept for the baseline site,  $\log(\text{terrestrial pollen sum}^{-1})_i$ , and  $\log(\text{accumulation rate})_i$  are the offsets of the pollen and charcoal models, respectively, and  $\varepsilon_i$  is the  $i$ th residual.

**Table S3. Study site information**

| Site            | Position         | Elevation, m | Geomorphology                                                                    | Vegetation                                                           | Ref(s). |
|-----------------|------------------|--------------|----------------------------------------------------------------------------------|----------------------------------------------------------------------|---------|
| L. El Trébol    | 41°15'S, 71°32'W | 977          | Glacial lake                                                                     | <i>N. dombeyi</i> and <i>A. chilensis</i> forest                     | (1)     |
| L. Padre Laguna | 41°30'S, 71°29'W | 1,280        | Dammed by a broad postglacial alluvial fan                                       | <i>N. dombeyi</i> and <i>A. chilensis</i> forest                     | (2)     |
| L. Huala Hué    | 41°30'S, 71°30'W | 849          | Blocked by a prominent glacial delta associated with Late Pleistocene meltwater  | <i>N. dombeyi</i> and <i>A. chilensis</i> forest                     | (2)     |
| L. Cóndor       | 42°20'S, 71°17'W | 818          | Dammed by alluvial fans                                                          | <i>A. chilensis</i> stands/steppe                                    | (3)     |
| L. Mosquito     | 42°29'S, 71°24'W | 551          | Dammed by Holocene alluvial fans                                                 | <i>A. chilensis</i> stands/steppe                                    | (3)     |
| L. La Zeta      | 43°17'S, 71°20'W | 774          | Situated on a high plain that was glaciated several times during the Pleistocene | <i>N. dombeyi</i> and <i>A. chilensis</i> - <i>Pinus</i> plantations | (4, 5)  |
| L. Theobald     | 43°26'S, 71°33'W | 678          | Formed in either an ice-block depression or glacial scour depression             | <i>N. dombeyi</i> and <i>A. chilensis</i> forest/steppe              | (4)     |

- Whitlock C, et al. (2006) Postglacial vegetation, climate, and fire history along the east side of the Andes (lat 41-42.5°S), Argentina. *Quat Res* 66(2):187-201.
- Iglesias V, Whitlock C, Bianchi MM, Villarosa G, Outes V (2012) Climate and local controls of long-term vegetation dynamics in northern Patagonia (lat 41°S). *Quat Res* 78(3):502-512.
- Iglesias V, Whitlock C, Bianchi MM, Villarosa G, Outes V (2012) Holocene climate variability and environmental history at the Patagonian forest/steppe ecotone: Lago Mosquito (42°29'3.89"S, 71°24'14.57"W) and Laguna del Cóndor (42°20'47.22"S, 71°17'07.62"W). *Holocene* 22:1254-1264.
- Iglesias V, Whitlock C, Markgraf V, Bianchi MM (2014) Postglacial history of the Patagonian forest/steppe ecotone (41-43°S). *Quat Sci Rev* 94:120-135.
- Schaebitz F (1994) Vegetation development and volcanism in the Esquel region, Chubut, Argentina. *Quaternary S Am Ant Penin* 10:7-29.

**Table S4. Chronology information**

| Site            | Core length, cm | Basal age, cal years B.P. | Total radiocarbon samples | Rejected samples | Age-depth modeling                   |
|-----------------|-----------------|---------------------------|---------------------------|------------------|--------------------------------------|
| L. El Trébol    | 634             | >18,500                   | 15                        | 0                | Polynomial regression                |
| L. Padre Laguna | 397             | ca. 4,900                 | 4                         | 0                | Cubic spline; Monte Carlo resampling |
| L. Huala Hué    | 731             | ca. 13,480                | 10                        | 2                | Cubic spline; Monte Carlo resampling |
| L. Cóndor       | 289             | >10,200                   | 8                         | 2                | Cubic spline; Monte Carlo resampling |
| L. Mosquito     | 1,506           | ca. 9,260                 | 19                        | 4                | Cubic spline; Monte Carlo resampling |
| L. La Zeta      | 763             | >18,500                   | 12                        | 0                | Cubic spline; Monte Carlo resampling |
| L. Theobald     | 532             | ca. 12,450                | 9                         | 2                | Cubic spline; Monte Carlo resampling |
